# Supplementary material for: Seroconversion stages COVID19 into distinct pathophysiological states
Source: eLife. 2021 Mar 16;10:e65508. doi: 10.7554/eLife.65508 (PMC7963480; doi:10.7554/eLife.65508)
Supplement: Supplementary file 1. — Table summarizing cohort characteristics. Information pertaining to less than 10 participants is indicated as <10 to prevent potential reidentification. For clinical labs, values represent the mean ± standard deviation. Acronyms for clinical laboratory measurements are as follows: BUN: blood urea nitrogen; CRP: C-reactive protein; ALT: alanine aminotransferase; ALP: alkaline phosphatase; AST: aspartate aminotransferase; BNP: brain natriuretic peptide. Comorbidities affecting each group are listed based on two different annotations: Carlson and Elixhauser. Acronyms for comorbidities are as follows: CHF: chronic heart failure; DM: diabetes mellitus; DMCX: diabetes with complications; METS: metastatic cancer; MI: myocardial infarction; PUD: peptic ulcer disease; PVD: peripheral vascular disease; HTN: hypertension; PHTN: pulmonary hypertension. Fisher’s exact test was used to calculate p-values for differences in % among groups, and the Mann–Whitney test was used to calculate p-values for differences in clinical lab values. [file elife-65508-supp1.xlsx]

## Sheet: Sheet1
			SARS-CoV-2 Negative	SARS-CoV-2 Positive	p-value					SARS-CoV-2 Positive Seroconversion-low	SARS-CoV-2 Positive Seroconversion-high	p-value
	n (%)		32 (30.5%)	73 (69.5%)				n (%)		35 (50.7%)	34 (49.3%)
	Age, median (interquartile range)		40 (33.2-59.2)	43 (23-54)	0.438			Age, median (interquartile range)		43 (29-57.5)	44 (21-54)	0.525
	Sex, n (%)				0.4036			Sex, n (%)				0.6324
		Female	12 (11.4%)	34 (32.4%)					Female	18 (26.1%)	15 (21.7%)
		Male	20 (19%)	39 (37.1%)					Male	17 (24.6%)	19 (27.5%)
	Race, n (%)				0.002967			Race, n (%)				0.2031
		American Indian and Alaska Native	0	<10					American Indian and Alaska Native	0	<10
		Asian	0	<10					Asian	<10	0
		Black or African American	<10	<10					Black or African American	<10	<10
		Multiple Race	<10	<10					Multiple Race	<10	<10
		Other	<10	31 (29.5%)					Other	17 (24.6%)	13 (18.8%)
		White or Caucasian	20 (19%)	21 (20%)					White or Caucasian	10 (14.5%)	10 (14.5%)
	Ethnicity, n (%)				0.000264			Ethnicity, n (%)				0.3145
		Hispanic	<10	43 (41%)					Hispanic	23 (33.3%)	19 (27.5%)
		Non-Hispanic	24 (22.9%)	27 (25.7%)					Non-Hispanic	10 (14.5%)	15 (21.7%)
	Hosp. median LOS days (IQR)		4 (2-6)	6 (3.5-9.5)	0.00845			Hosp. median LOS days (IQR)		6 (4-9.8)	6 (3-8.8)	0.912
	ICU, n (%)		<10	19 (18.1%)	0.466			ICU, n (%)		<10	14 (20.3%)	0.01209
	Maximum respiratory support, n (%)				0.1101			Maximum respiratory support, n (%)				0.2307
		Room Air	<10	<10					Room Air	<10	<10
		Oxygen Mask	18 (17.1%)	39 (37.1%)					Oxygen Mask	19 (27.5%)	18 (26.1%)
		Non-invasive ventilation	<10	<10					Non-invasive ventilation	<10	<10
		High flow nasal canula	0	<10					High flow nasal canula	<10	<10
		Heated high flow nasal canula	0	<10					Heated high flow nasal canula	<10	<10
		Ventilator	<10	<10					Ventilator	<10	<10
	Lab name, mean ± sd							Lab name, mean ± sd						Reference range
		hemoglobin, g/dL	12.1 ± 2.3	12.8 ± 2.5	0.619722				hemoglobin, g/dL	13.1 ± 2.3	12.4 ± 2.6	0.455071		10.3-18.1 g/dL
		platelet count, 10*3/mcL	241 ± 108.2	242.6 ± 113.5	0.619722				platelet count, 10*3/mcL	190.1 ± 79.5	293.8 ± 123.5	0.0009338		150-500 10*9/L
		thrombocytopenia, n (%)	<10	14 (19.7)	1				thrombocytopenia, n (%)	10 (29.4)	<10	0.132
		white blood cell count, 10*3/mcL	8.2 ± 4.6	7.1 ± 3.9	0.619722				white blood cell count, 10*3/mcL	5.2 ± 2.7	8.8 ± 4	0.0016675		4.0-11.1 10*9/L
		bun, mg/dL	16.1 ± 10.1	14.7 ± 8.3	0.619722				bun, mg/dL	12.8 ± 7.9	16 ± 7.6	0.0742571		7-25 mg/dL
		creatinine, mg/dL	0.9 ± 0.4	0.7 ± 0.3	0.06279				creatinine, mg/dL	0.7 ± 0.3	0.7 ± 0.2	0.949		0.23-1.04 mg/dL
		red cell distribution width, %	14.2 ± 1.7	13.5 ± 1.2	0.1426				red cell distribution width, %	13.4 ± 1.2	14.2 ± 2	0.3013		11.7-15.5 %
		absolute lymphocyte count, 10*3/mcL	2 ± 1.3	1.4 ± 0.7	0.21206				absolute lymphocyte count, 10*3/mcL	1.1 ± 0.5	1.6 ± 0.8	0.02116		1.0-4.8 10*9/L
		lymphopenia, n (%)	<10	22 (32.4)	0.1915				lymphopenia, n (%)	15 (44.1)	<10	0.1144
		albumin, g/dL	3.5 ± 0.5	3.4 ± 0.5	0.619722				albumin, g/dL	3.6 ± 0.4	3.2 ± 0.6	0.0312417		3.5-5.6 g/dL
		hypoalbuminemia, n (%)	11 (47.8)	36 (54.5)	0.6329				hypoalbuminemia (%)	14 (45.2)	20 (62.5)	0.2101
		crp, mg/L	67.3 ± 84.4	96.1 ± 92.1	0.619722				crp, mg/L	99.2 ± 98.2	84.9 ± 86.6	0.642722		0-10 mg/L
		protein total, g/dL	6.6 ± 0.8	6.7 ± 0.8	0.619722				protein total, g/dL	6.7 ± 0.7	6.7 ± 0.8	0.733579		6.3-8.9 g/dL
		alt, U/L	18.1 ± 13.4	42 ± 29.4	0.1426				alt, U/L	39.7 ± 26.1	46.3 ± 32.6	0.622437		7-52 IU/L
		alp, U/L	92.9 ± 38.3	92.6 ± 47.3	0.619722				alp, U/L	70.4 ± 23	109.2 ± 55.2	0.0169625		38-126 IU/L (Adult); 129-291 IU/L (Ped.)
		ast, U/L	34.9 ± 30.5	41.3 ± 21.6	0.21206				ast, U/L	40.3 ± 17.8	43.8 ± 25.5	0.736		12-40 IU/L
		bilirubin total, mg/dL	0.5 ± 0.2	0.5 ± 0.3	0.827				bilirubin total, mg/dL	0.6 ± 0.2	0.5 ± 0.2	0.455071		0.2-1.3 mg/dL
		ddimer, ng/mL	2525.6 ± 3062.3	1339.4 ± 1329.9	0.619722				ddimer, ng/mL	565.6 ± 273.9	1909.1 ± 1557.8	0.00279067		< 500 ng/ml (threshold for positive test)
		ferritin, ng/mL	239.7 ± 253.4	450.2 ± 450.4	0.398667				ferritin, ng/mL	422.6 ± 399.1	494.3 ± 516.9	0.949		11-307 ng/ml
		bilirubin direct, mg/dL	0.1 ± 0.1	0.1 ± 0.1	0.714211				bilirubin direct, mg/dL	0.1 ± 0.1	0.1 ± 0.1	0.642722		0.0-0.3 mg/dL
		bilirubin indirect, mg/dL	0.3 ± 0.1	0.4 ± 0.2	0.619722				bilirubin indirect, mg/dL	0.4 ± 0.1	0.4 ± 0.2	0.887143		0.0-1.2 mg/dL
		troponin, ng/mL	0 ± 0	0 ± 0	0.619722				troponin, ng/mL	0 ± 0	0 ± 0	0.161767		<0.04 ng/ml
		prothrombin time, seconds	15.3 ± 2.2	14.3 ± 1.2	0.619722				prothrombin time, seconds	14 ± 1	14.6 ± 1.2	0.395182		12-15 seconds
		absolute neutrophil count, 10*3/mcL	3.8 ± 3.3	4.7 ± 4	0.817048				absolute neutrophil count, 10*3/mcL	3.1 ± 2.8	5.9 ± 4.5	0.15755		1.8-6.6 10*9/L
		neutropenia, n (%)	<10	<10	0.6125				neutropenia, n (%)	<10	<10	0.1775
		bnp, ng/L	NA ± NA	50.6 ± 44.7	0.820682				bnp, ng/L	55.9 ± 52.8	91.9 ± 131.2	0.4692		<100 ng/L
	Charlson comorbidity							Charlson comorbidity
		chf	<10	<10	0.241296				chf	<10	<10	0.149664
		dementia	<10	<10	1				dementia	<10	<10	1
		dm	<10	<10	0.582258				dm	<10	<10	0.340487
		dmcx	<10	<10	0.117386				dmcx	<10	<10	1
		hiv	<10	<10	1				hiv	<10	<10	1
		livermild	<10	<10	0.0790322				livermild	<10	<10	0.709046
		liversevere	<10	<10	0.0288615				liversevere	<10	<10	1
		mets	<10	<10	0.583063				mets	<10	<10	0.492537
		mi	<10	<10	0.00297318				mi	<10	<10	1
		paralysis	<10	<10	0.638371				paralysis	<10	<10	1
		pud	<10	<10	0.218462				pud	<10	<10	1
		pulmonary	19/31	19/71	0.00159346				pulmonary	<10	<10	0.783992
		pvd	<10	<10	0.178239				pvd	<10	<10	0.197447
		renal	<10	<10	0.0128156				renal	<10	<10	1
		rheumatic	<10	<10	0.364726				rheumatic	<10	<10	0.238806
		stroke	<10	<10	1				stroke	<10	<10	1
	Elixhauser comorbidity							Elixhauser comorbidity
		alcohol	<10	<10	0.448935				alcohol	<10	<10	0.113892
		anemia	<10	<10	0.117386				anemia	<10	<10	1
		arrhythmia	17/31	22/71	0.0279722				arrhythmia	11/34	10/34	1
		bloodloss	<10	<10	0.00950576				bloodloss	<10	<10	1
		chf	<10	<10	0.241296				chf	<10	<10	0.149664
		coagulopathy	<10	15/71	0.614032				coagulopathy	<10	<10	0.559676
		depression	14/31	14/71	0.0146726				depression	10/34	<10	0.0615099
		dm	<10	<10	0.37914				dm	<10	<10	0.476283
		dmcx	<10	15/71	0.614032				dmcx	<10	10/34	0.241664
		drugs	<10	<10	0.241296				drugs	<10	<10	0.0544001
		fluidslytes	21/31	47/71	1				fluidslytes	23/34	23/34	1
		htn	18/31	33/71	0.389412				htn	17/34	15/34	0.808285
		hypothyroid	<10	<10	0.364726				hypothyroid	<10	<10	1
		liver	11/31	<10	0.0132754				liver	<10	<10	1
		lymphoma	<10	<10	1				lymphoma	<10	<10	0.238806
		mets	<10	<10	0.583063				mets	<10	<10	0.492537
		neuroother	10/31	<10	0.00569701				neuroother	<10	<10	0.672845
		obesity	13/31	38/71	0.389412				obesity	18/34	20/34	0.807308
		paralysis	<10	<10	0.638371				paralysis	<10	<10	1
		phtn	<10	<10	0.349257				phtn	<10	<10	0.709046
		psychoses	<10	<10	1				psychoses	<10	<10	1
		pud	<10	<10	0.218462				pud	<10	<10	1
		pulmonary	19/31	19/71	0.00159346				pulmonary	10/34	<10	0.783992
		pvd	<10	<10	0.178239				pvd	<10	<10	0.197447
		renal	<10	<10	0.0128156				renal	<10	<10	1
		rheumatic	<10	<10	0.126074				rheumatic	<10	<10	0.113892
		tumor	<10	<10	0.195236				tumor	<10	<10	1
		valvular	<10	<10	0.638371				valvular	<10	<10	1
		weightloss	<10	<10	0.117386				weightloss	<10	<10	1
